# Supplementary material for: Computational Insights into Binding of Bisphosphates to Farnesyl Pyrophosphate Synthase
Source: PubMed Central journal article supplement (PMC3343387; doi:10.2174/092986711794088335), 2011-01
Supplement: CMC-18-220_SD1.pdf [file CMC-18-220_SD1.pdf]

## SUPPLEMENTARY MATERIAL

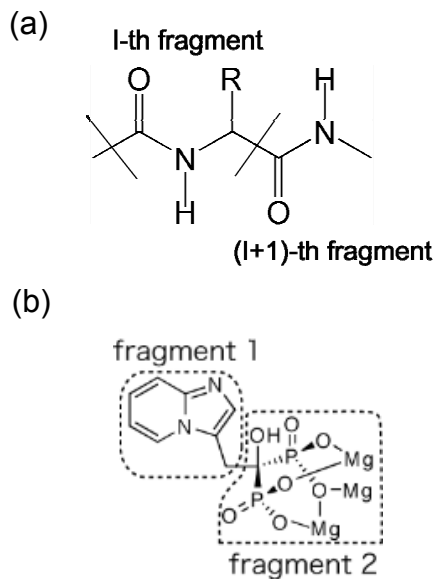

**Fig. (S1).** Fragmentation in FMO. (a) Fragmentation of protein. (b) Fragmentation of N-BP.

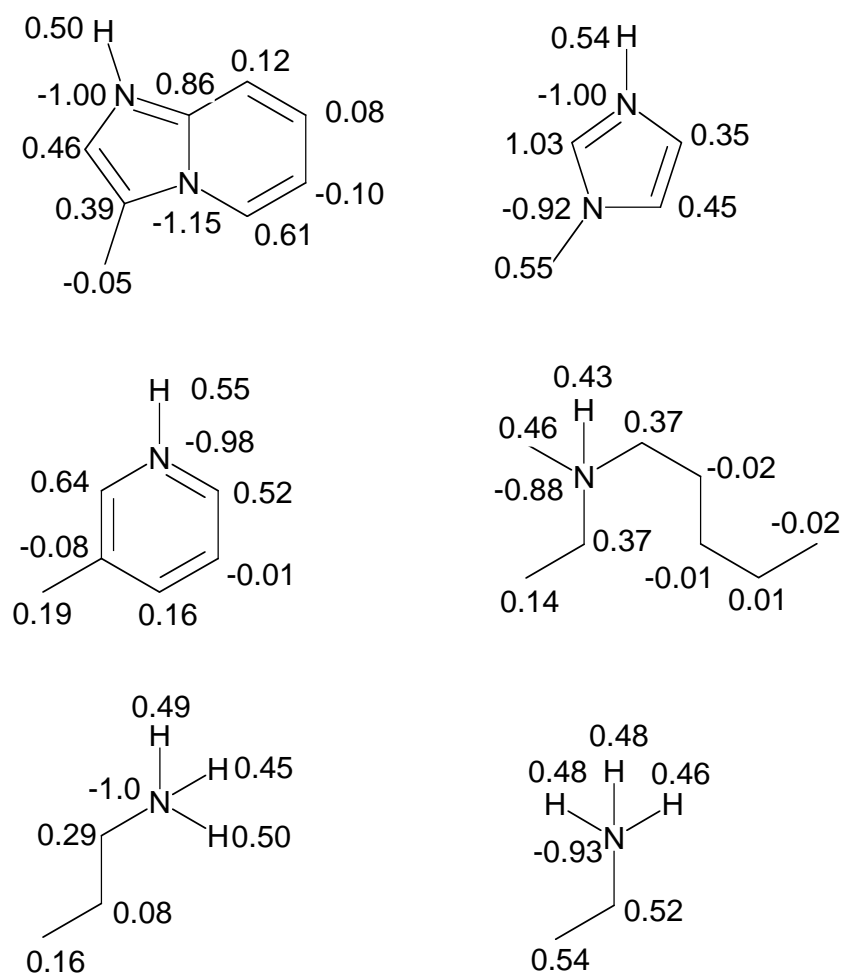

**Fig. (S2).** Atomic charge on the sidechain of N-BPs. Charges are derived from two-body Mulliken atomic charges calculated by FMO2-MP2/6-31G calculation. The atomic charges of hydrogen atoms except polar hydrogen atoms are united into the carbon atom.

**Table S1. Pair Interaction Energy Difference (in kcal/mol) of N-BPs from Minodronate**

| Residue | Inhibitor   | $\Delta$ PIE(PCP) | $\Delta$ PIE(SC) | $\Delta$ PIE(PCP+SC) |
|---------|-------------|-------------------|------------------|----------------------|
| Arg60   | zoledronate | -0.419            | 3.96             | 3.541                |
|         | risedronate | -0.087            | 2.171            | 2.084                |
|         | ibandronate | -0.585            | 6.274            | 5.689                |
|         | alendronate | -0.504            | 7.183            | 6.679                |
|         | pamidronate | -0.627            | 9.983            | 9.356                |
| Asp103  | zoledronate | -2.202            | -2.21            | -4.412               |
|         | risedronate | -1.747            | -0.611           | -2.358               |
|         | ibandronate | -4.278            | -5.558           | -9.836               |
|         | alendronate | -5.499            | -1.346           | -6.845               |
|         | pamidronate | -3.474            | -5.116           | -8.59                |
| Asp107  | zoledronate | -1.111            | -1.612           | -2.723               |
|         | risedronate | -0.198            | -0.73            | -0.928               |
|         | ibandronate | -2.468            | -3.347           | -5.815               |
|         | alendronate | -1.719            | -2.605           | -4.324               |
|         | pamidronate | -1.961            | -2.929           | -4.89                |
| Lys200  | zoledronate | 0.415             | 7.605            | 8.02                 |
|         | risedronate | -0.736            | 7.409            | 6.673                |
|         | ibandronate | -0.469            | 7.823            | 7.354                |
|         | alendronate | -1.149            | 19.715           | 18.566               |
|         | pamidronate | 0.033             | 7.539            | 7.572                |
| Asp243  | zoledronate | -0.475            | -8.614           | -9.089               |
|         | risedronate | -0.219            | -2.283           | -2.502               |
|         | ibandronate | -1.273            | -6.765           | -8.038               |
|         | alendronate | -0.69             | -10.922          | -11.612              |
|         | pamidronate | -0.788            | -9.678           | -10.466              |
| Lys257  | zoledronate | 0.405             | 6.51             | 6.915                |
|         | risedronate | 0.355             | 1.123            | 1.478                |
|         | ibandronate | 0.921             | 4.488            | 5.409                |
|         | alendronate | 0.939             | 5.739            | 6.678                |
|         | pamidronate | 0.901             | 7.41             | 8.311                |

SC stands for side chain.

**Table S2. Charge Transfer (in a.u.) to N-BPs from FPPS**

| Inhibitor   | $\Delta$ Q(PCP+Mg) | $\Delta$ Q(SC) | $\Delta$ Q |
|-------------|--------------------|----------------|------------|
| minodronate | 2.4927             | 0.0923         | 2.585      |
| zoledronate | 2.4501             | 0.1329         | 2.583      |
| risedronate | 2.4678             | 0.1051         | 2.5729     |
| ibandronate | 2.5147             | 0.2024         | 2.7171     |
| alendronate | 2.4668             | 0.1717         | 2.6385     |
| pamidronate | 2.4725             | 0.1241         | 2.5966     |

SC stands for side chain.

**Table S3. Calculated Thermodynamic and Local Water Structure Data for Each of the 20 Hydration Sites (in kcal/mol)**

| # site | $\Delta H$ | $-T\Delta S$ | $\Delta G$ |
|--------|------------|--------------|------------|
| 1      | -8.53      | 5.28         | -3.25      |
| 2      | -8.23      | 5.31         | -2.92      |
| 3      | -4.25      | 4.04         | -0.21      |
| 4      | -5.51      | 4.32         | -1.19      |
| 5      | -7.47      | 3.64         | -3.83      |
| 6      | -11.49     | 3.72         | -7.77      |
| 7      | -6.72      | 3.59         | -3.13      |
| 8      | -1.25      | 2.73         | 1.48       |
| 9      | -1.56      | 2.62         | 1.06       |
| 10     | -5.27      | 4.05         | -1.22      |
| 11     | -2.16      | 2.32         | 0.16       |
| 12     | 1.78       | 2.42         | 4.2        |
| 13     | -6.18      | 2.65         | -3.53      |
| 14     | -5.91      | 2.58         | -3.33      |
| 15     | -4.73      | 2.38         | -2.35      |
| 16     | -1.74      | 2.88         | 1.14       |
| 17     | -2.19      | 1.61         | -0.58      |
| 18     | -4.52      | 1.5          | -3.02      |
| 19     | -3.34      | 1.24         | -2.1       |
| 20     | 2.92       | 1.13         | 4.05       |

$\Delta H$  is average energy of interaction of the water molecules with the rest of the system in a given hydration site.  $-T\Delta S$  is the excess entropic contribution to the free energy calculated from a truncated expansion of the excess entropy in terms of correlations in the single particle translational and rotational density.  $\Delta G$  is the total free energy ( $\Delta G = \Delta H - T\Delta S$ ).

**Table S4. The Thermodynamics Properties for Individual Sites (in kcal/mol)**

| site | property     | minodronate | zoledronate | risedronate | ibandronate | alendronate | pamidronate |
|------|--------------|-------------|-------------|-------------|-------------|-------------|-------------|
| 1    | $-T\Delta S$ | -5.3        | -5.3        | -5.2        | -5.3        | -5.3        | -5.3        |
|      | $\Delta H$   | 8.5         | 8.5         | 8.4         | 8.5         | 8.5         | 8.5         |
|      | $\Delta G$   | 3.2         | 3.2         | 3.2         | 3.2         | 3.2         | 3.2         |
| 2    | $-T\Delta S$ | 0.0         | 0.0         | 0.0         | 0.0         | 0.0         | 0.0         |
|      | $\Delta H$   | 0.0         | 0.0         | 0.0         | 0.0         | 0.0         | 0.0         |
|      | $\Delta G$   | 0.0         | 0.0         | 0.0         | 0.0         | 0.0         | 0.0         |
| 3    | $-T\Delta S$ | -0.6        | -0.6        | -0.8        | -1.0        | -0.5        | -0.3        |
|      | $\Delta H$   | 0.6         | 0.6         | 0.8         | 1.0         | 0.6         | 0.3         |
|      | $\Delta G$   | 0.0         | 0.0         | 0.0         | 0.1         | 0.0         | 0.0         |
| 4    | $-T\Delta S$ | -2.8        | -2.6        | -2.8        | -2.3        | -2.3        | -2.2        |
|      | $\Delta H$   | 3.5         | 3.3         | 3.6         | 3.0         | 2.9         | 2.8         |
|      | $\Delta G$   | 0.8         | 0.7         | 0.8         | 0.6         | 0.6         | 0.6         |
| 5    | $-T\Delta S$ | -3.0        | -2.8        | -2.7        | -2.5        | -2.5        | -3.5        |
|      | $\Delta H$   | 6.1         | 5.8         | 5.5         | 5.2         | 5.1         | 7.2         |
|      | $\Delta G$   | 3.1         | 3.0         | 2.8         | 2.7         | 2.6         | 3.7         |

(Table S4). Contd.....

| site | property | minodronate | zoledronate | risedronate | ibandronate | alendronate | pamidronate |
|------|----------|-------------|-------------|-------------|-------------|-------------|-------------|
| 6    | -T Δ S   | -3.7        | -3.7        | -3.7        | -3.7        | -3.7        | -3.7        |
|      | Δ H      | 11.5        | 11.5        | 11.5        | 11.5        | 11.5        | 11.5        |
|      | Δ G      | 7.8         | 7.8         | 7.8         | 7.8         | 7.8         | 7.8         |
| 7    | -T Δ S   | -0.2        | -0.3        | 0.0         | 0.0         | 0.0         | -0.1        |
|      | Δ H      | 0.3         | 0.5         | 0.0         | 0.0         | 0.0         | 0.2         |
|      | Δ G      | 0.2         | 0.2         | 0.0         | 0.0         | 0.0         | 0.1         |
| 8    | -T Δ S   | -2.7        | -2.7        | -2.7        | -2.7        | -2.7        | -2.7        |
|      | Δ H      | 1.2         | 1.2         | 1.2         | 1.2         | 1.2         | 1.2         |
|      | Δ G      | -1.5        | -1.5        | -1.5        | -1.5        | -1.5        | -1.5        |
| 9    | -T Δ S   | -2.2        | -2.3        | -1.6        | -2.0        | -2.3        | -1.5        |
|      | Δ H      | 1.3         | 1.4         | 1.0         | 1.2         | 1.3         | 0.9         |
|      | Δ G      | -0.9        | -0.9        | -0.7        | -0.8        | -0.9        | -0.6        |
| 10   | -T Δ S   | 0.0         | 0.0         | 0.0         | -0.1        | -0.2        | 0.0         |
|      | Δ H      | 0.0         | 0.0         | 0.0         | 0.2         | 0.2         | 0.0         |
|      | Δ G      | 0.0         | 0.0         | 0.0         | 0.0         | 0.1         | 0.0         |
| 11   | -T Δ S   | -2.3        | -2.2        | -2.1        | -2.0        | -1.9        | -2.0        |
|      | Δ H      | 2.2         | 2.0         | 2.0         | 1.9         | 1.8         | 1.9         |
|      | Δ G      | -0.2        | -0.2        | -0.2        | -0.1        | -0.1        | -0.1        |
| 12   | -T Δ S   | -2.4        | 0.0         | -0.8        | -2.4        | 0.0         | 0.0         |
|      | Δ H      | -1.8        | 0.0         | -0.6        | -1.8        | 0.0         | 0.0         |
|      | Δ G      | -4.2        | 0.0         | -1.5        | -4.2        | 0.0         | 0.0         |
| 13   | -T Δ S   | -2.6        | -2.6        | -2.6        | -2.6        | -2.6        | -2.6        |
|      | Δ H      | 6.2         | 6.2         | 6.2         | 6.2         | 6.2         | 6.2         |
|      | Δ G      | 3.5         | 3.5         | 3.5         | 3.5         | 3.5         | 3.5         |
| 14   | -T Δ S   | -0.6        | -0.6        | -0.7        | -0.5        | -0.5        | -0.6        |
|      | Δ H      | 1.4         | 1.3         | 1.7         | 1.0         | 1.1         | 1.4         |
|      | Δ G      | 0.8         | 0.8         | 0.9         | 0.6         | 0.6         | 0.8         |
| 15   | -T Δ S   | -2.4        | -2.4        | -2.4        | -2.4        | -1.6        | 0.0         |
|      | Δ H      | 4.7         | 4.7         | 4.7         | 4.7         | 3.1         | 0.0         |
|      | Δ G      | 2.3         | 2.3         | 2.3         | 2.3         | 1.5         | 0.0         |
| 16   | -T Δ S   | -0.4        | 0.0         | 0.0         | -2.9        | 0.0         | 0.0         |
|      | Δ H      | 0.3         | 0.0         | 0.0         | 1.7         | 0.0         | 0.0         |
|      | Δ G      | -0.2        | 0.0         | 0.0         | -1.1        | 0.0         | 0.0         |
| 17   | -T Δ S   | 0.0         | -0.1        | 0.0         | 0.0         | 0.0         | 0.0         |
|      | Δ H      | 0.0         | 0.1         | 0.0         | 0.1         | 0.0         | 0.0         |
|      | Δ G      | 0.0         | 0.0         | 0.0         | 0.0         | 0.0         | 0.0         |
| 18   | -T Δ S   | -1.5        | -1.5        | -1.5        | -1.5        | -1.5        | -1.5        |
|      | Δ H      | 4.5         | 4.5         | 4.5         | 4.5         | 4.5         | 4.5         |
|      | Δ G      | 3.0         | 3.0         | 3.0         | 3.0         | 3.0         | 3.0         |
| 19   | -T Δ S   | -0.1        | -0.2        | -0.2        | -0.2        | -0.1        | -0.1        |
|      | Δ H      | 0.4         | 0.5         | 0.4         | 0.5         | 0.3         | 0.4         |
|      | Δ G      | 0.2         | 0.3         | 0.3         | 0.3         | 0.2         | 0.2         |
| 20   | -T Δ S   | -1.1        | -0.8        | -1.1        | -1.1        | 0.0         | 0.0         |
|      | Δ H      | -2.9        | -2.0        | -2.9        | -2.7        | -0.1        | 0.0         |
|      | Δ G      | -4.1        | -2.8        | -4.1        | -3.8        | -0.1        | 0.0         |
